# Supplementary material for: The Main Medicinal Plants in Arid Regions of Uzbekistan and Their Traditional Use in Folk Medicine
Source: MDPI journal article supplement (doi:10.3390/plants12162950), 2023-08-15
Supplement: s1 [file s1]

**Table S1.** Chenklist of medicinal plants distributed in the arid regions of Uzbekistan.

| №   | Plant Name                                                                 |
|-----|----------------------------------------------------------------------------|
| 1.  | <b>ALISMATACEAE VENT.</b><br><i>Alisma lanceolatum</i> With.               |
| 2.  | <i>Alisma plantago-aquatica</i> L.                                         |
| 3.  | <i>Sagittaria sagittifolia</i> L.                                          |
| 4.  | <i>Sagittaria trifolia</i> L.                                              |
| 5.  | <b>APOCYNACEAE JUSS.</b><br><i>Trachomitum scabrum</i> (Russanov) Pobed.   |
| 6.  | <i>Cynanchum acutum</i> subsp. <i>sibiricum</i> (Willd.) Rech. f.          |
| 7.  | <i>Vincetoxicum sibiricum</i> (L.) Decne.                                  |
| 8.  | <b>ARACEAE JUSS.</b><br><i>Eminium lehmannii</i> (Bunge) O.Kuntze          |
| 9.  | <b>AMARANTHACEAE JUSS.</b><br><i>Agriophyllum lateriflorum</i> (Lam.) Moq. |
| 10. | <i>Agriophyllum latifolium</i> Fisch. & C.A.Mey.                           |
| 11. | <i>Agriophyllum minus</i> Fisch. & C.A.Mey.ex Fenzi                        |
| 12. | <i>Amaranthus albus</i> L.                                                 |
| 13. | <i>Amaranthus blitoides</i> S.Watson                                       |
| 14. | <i>Amaranthus blitum</i> L.                                                |
| 15. | <i>Amaranthus graecizans</i> L.                                            |
| 16. | <i>Amaranthus hybridus</i> L.                                              |
| 17. | <i>Amaranthus retroflexus</i> L.                                           |
| 18. | <i>Anabasis annua</i> Bunge                                                |
| 19. | <i>Anabasis aphylla</i> L.                                                 |
| 20. | <i>Anabasis brachiata</i> Fisch. & C.A. Mey. ex Kar. & Kir.                |
| 21. | <i>Anabasis cretacea</i> Pall.                                             |
| 22. | <i>Anabasis eriopoda</i> (Schrenk) Paulsen                                 |
| 23. | <i>Anabasis salsa</i> (Ledeb.) Benth. ex Volkens                           |
| 24. | <i>Anabasis truncata</i> (Schrenk) Bunge                                   |
| 25. | <i>Anabasis turkestanica</i> Korovin ex Iljin                              |
| 26. | <i>Atriplex prostrata</i> subsp. <i>calotheca</i> (Rafn) M.A.Gust.         |
| 27. | <i>Atriplex micrantha</i> Ledeb.                                           |
| 28. | <i>Atriplex moneta</i> Bunge ex Boiss.                                     |
| 29. | <i>Atriplex patula</i> L.                                                  |
| 30. | <i>Atriplex prostrata</i> Boucher ex DC.                                   |
| 31. | <i>Atriplex sagittata</i> Borkh.                                           |
| 32. | <i>Atriplex sibirica</i> L.                                                |
| 33. | <i>Atriplex tatarica</i> L.                                                |
| 34. | <i>Bassia hyssopifolia</i> (Pall.) Kuntze                                  |
| 35. | <i>Bassia odontopera</i> (Schrenk) Freitag& G.Kadereit                     |
| 36. | <i>Bassia prostrata</i> (L.) Beck                                          |
| 37. | <i>Bassia Pilosa</i> (Fisch.& C.A.Mey) Freitag&G.Kaderit                   |
| 38. | <i>Bassia scoparia</i> (L.) F.J.Scott                                      |
| 39. | <i>Blitum virgatum</i> L.                                                  |
| 40. | <i>Camphorosma lessingii</i> Litv.                                         |
| 41. | <i>Camphorosma monspeliaca</i> L.                                          |
| 42. | <i>Caroxylon dendrides</i> (Pall.) Tzvelev                                 |
| 43. | <i>Caroxylon gemmascens</i> (Pall.) Tzvelev                                |

|     |                                                               |
|-----|---------------------------------------------------------------|
| 44. | <i>Ceratocarpus arenarius</i> L.                              |
| 45. | <i>Chenopodium album</i> L.                                   |
| 46. | <i>Chenopodiastrum murale</i> (L.) S.Fuentes, Uotila&Borsch   |
| 47. | <i>Chenopodium vulvaria</i> L.                                |
| 48. | <i>Climacoptera transoxana</i><br>(Iljin) Botsch.             |
| 49. | <i>Corispermum lehmannianum</i> Bunge                         |
| 50. | <i>Corispermum squarrosum</i> L.                              |
| 51. | <i>Dysphania botrys</i> (L.) Mosyakin et Clemants             |
| 52. | <i>Gamanthus gamocarpus</i> (Moq.) Bunge                      |
| 53. | <i>Girgensohnia oppositiflora</i> (Pall.) Fenzl               |
| 54. | <i>Halocharis hispida</i> (Schrenk) Bunge                     |
| 55. | <i>Halocnemum strobilaceum</i> (Pall.) M.Bieb.                |
| 56. | <i>Halostachys casica</i> (M.Bieb) C.A.Mey.                   |
| 57. | <i>Halothamnus subaphyllus</i> (C.A. Mey.) Botsch             |
| 58. | <i>Halothamnus glaucus</i> (Bieb.) Botsch.                    |
| 59. | <i>Halothamnus iliensis</i> (Lipsky) Botsch.                  |
| 60. | <i>Haloxylon ammodendron</i><br>(C.A.Mey.) Bunge ex Fenzl     |
| 61. | <i>Haloxylon persicum</i> Bunge                               |
| 62. | <i>Kalidium caspicum</i> (L.) Ung.-Sternb.                    |
| 63. | <i>Krascheninnikovia ceratoides</i> (L.) Gueldenst.           |
| 64. | <i>Nanophyton erinaceum</i> (Pall.) Bunge                     |
| 65. | <i>Oxybasis rubra</i> (L.) S.Fuentes, Uotila&Borsch           |
| 66. | <i>Oxybasis urbica</i> (L.) S.Fuentes, Uotila&Borsch          |
| 67. | <i>Salicornia europaea</i> L.                                 |
| 68. | <i>Salsola australis</i> R. Br.                               |
| 69. | <i>Salsola collina</i> Pall.                                  |
| 70. | <i>Soda inermis</i> Fourr.                                    |
| 71. | <i>Spinacia turkestanica</i> Iljin                            |
| 72. | <i>Suaeda altissima</i> (L.) Pall.                            |
| 73. | <i>Suaeda arcuata</i> Bunge                                   |
| 74. | <i>Suaeda lehmannii</i> (Bunge) Karpalov, Akhani &Roalson     |
| 75. | <i>Suaeda microphylla</i> Pall.                               |
| 76. | <i>Suaeda physophora</i> Pall.                                |
| 77. | <i>Suaeda prostrate</i> Pall.                                 |
| 78. | <i>Turania sogdiana</i> (Bunge) Akhani                        |
| 79. | <i>Xylosalsola arbuscular</i> (Pall.) Tzvelev                 |
| 80. | <i>Xylosalsola paletzkiana</i> (Litv.) Akhani &Roalson        |
| 81. | <i>Xylosalsola richteri</i> (Moq.) Akhani &Roalson            |
| 82. | <b>AMARYLLIDACEAE.</b><br><i>Allium caeruleum</i> Pall        |
| 83. | <i>Allium sabulosum</i> Steven ex Bunge                       |
| 84. | <b>APIACEAE LINDL.</b><br><i>Chaerophyllum prescottii</i> DC. |
| 85. | <i>Cuminum setifolium</i> (Boiss.) Koso-Pol.                  |
| 86. | <i>Daucus carota</i> L.                                       |
| 87. | <i>Dorema sabulosum</i> Litv.                                 |
| 88. | <i>Eryngium octophyllum</i> Korovin                           |
| 89. | <i>Ferula caspica</i> M. Bieb.                                |

|      |                                                                               |
|------|-------------------------------------------------------------------------------|
| 90.  | <i>Ferula diversivittata</i> Regel & Schmalh.                                 |
| 91.  | <i>Ferula dubjanskyi</i> Korovin                                              |
| 92.  | <i>Ferula foetida</i> (Bunge) Regel                                           |
| 93.  | <i>Ferula karelinii</i> Bunge                                                 |
| 94.  | <i>Ferula litwinowiana</i> Koso-Pol.                                          |
| 95.  | <i>Ferula varia</i> (Schrenk) Trautv.                                         |
| 96.  | <i>Scandix pecten-veneris</i> L.                                              |
| 97.  | <i>Seseli jomuticum</i> Schischk.                                             |
| 98.  | <i>Zosima absinthiifolia</i> (Vent.) Link                                     |
| 99.  | <b>ASPARAGACEAE JUSS.</b><br><i>Asparagus brachyphyllus</i> Turcz.            |
| 100. | <i>Asparagus officinalis</i> L.                                               |
| 101. | <i>Asparagus persicus</i> Baker                                               |
| 102. | <i>Asparagus turkestanicus</i> Popov                                          |
| 103. | <b>ASPHODELACEAE JUSS.</b><br><i>Eremurus anisopterus</i> (Kar. & Kir.) Regel |
| 104. | <i>Eremurus inderiensis</i> (M.Bieb.) Regel                                   |
| 105. | <b>ASTERACEAE BERCHT. &amp; J.PRESL</b><br><i>Achillea nobilis</i> L.         |
| 106. | <i>Achillea santolinoides</i> subsp. <i>wilhelmsii</i> (K. Koch) Greuter      |
| 107. | <i>Achillea arabica</i> Kotschy                                               |
| 108. | <i>Acroptilon repens</i> (L.) DC.                                             |
| 109. | <i>Amberboa nana</i> (Boiss.) Ilgin                                           |
| 110. | <i>Amberboa turanica</i> Ilgin                                                |
| 111. | <i>Artemisia annua</i> L.                                                     |
| 112. | <i>Artemisia arenaria</i> DC.                                                 |
| 113. | <i>Artemisia austriaca</i> Jacq.                                              |
| 114. | <i>Artemisia biennis</i> Wild.                                                |
| 115. | <i>Artemisia diffusa</i> Krasch.ex Poljakov                                   |
| 116. | <i>Artemisia ferganensis</i> Krasch. ex Poljakov                              |
| 117. | <i>Artemisia juncea</i> Kar. & Kir.                                           |
| 118. | <i>Artemisia leucodes</i> Schrenk                                             |
| 119. | <i>Artemisia oliveriana</i> J.Gay ex Besser                                   |
| 120. | <i>Artemisia pauciflora</i> Weber ex Stechm                                   |
| 121. | <i>Artemisia santolina</i> Schrenk                                            |
| 122. | <i>Artemisia scoparia</i> Waldst. & Kit.                                      |
| 123. | <i>Artemisia songarica</i> Schrenk ex Fisch.&C.A.Mey                          |
| 124. | <i>Artemisia terrae-albae</i> Krasch.                                         |
| 125. | <i>Artemisia turanica</i> Krasch.                                             |
| 126. | <i>Artemisia vulgaris</i> L.                                                  |
| 127. | <i>Bidens tripartita</i> L.                                                   |
| 128. | <i>Centaurea benedicta</i> (L.)L.                                             |
| 129. | <i>Centaurea depressa</i> M.Bieb.                                             |
| 130. | <i>Centaurea iberica</i> Trevir. ex Spreng                                    |
| 131. | <i>Centaurea pulchella</i> Ledeb.                                             |
| 132. | <i>Centaurea virgata</i> subsp. <i>squarrosa</i> (Boiss.) Gugler              |
| 133. | <i>Cichorium intybus</i> L.                                                   |
| 134. | <i>Cirsium arvense</i> (L.) Scop.                                             |
| 135. | <i>Cirsium vulgare</i> (Savi) Ten.                                            |
| 136. | <i>Erigeron canadensis</i> L.                                                 |

|      |                                                                                                |
|------|------------------------------------------------------------------------------------------------|
| 137. | <i>Filago arvensis</i> L.                                                                      |
| 138. | <i>Filago pyramidata</i> L.                                                                    |
| 139. | <i>Garhadiolus papposus</i> Boiss. & Buhse                                                     |
| 140. | <i>Handelia trichophylla</i> Heimerl                                                           |
| 141. | <i>Helichrysum arenarium</i> (L.) Moench.                                                      |
| 142. | <i>Jurinea cyanoides</i> (L.) Reichenb.                                                        |
| 143. | <i>Koelpinia linearis</i> Pall.                                                                |
| 144. | <i>Lachnophyllum gossypinum</i> Bunge                                                          |
| 145. | <i>Lactuca serriola</i> L.                                                                     |
| 146. | <i>Lactuca tatarica</i> (L.) C.A.Mey.                                                          |
| 147. | <i>Lactuca undulata</i> Ledeb.                                                                 |
| 148. | <i>Microcephala lamellata</i> (Bunge) Pobed.                                                   |
| 149. | <i>Onopordum acanthium</i> L.                                                                  |
| 150. | <i>Pentanema britannicum</i> (L.) D.Gut.Larr., Santos-Vicente, Anderb., E.Rico & M.M.Mart.Ort. |
| 151. | <i>Pentanema caspicum</i> (F.K.Blum ex Ledeb.) G.V.Boiko, Korniy. & Mosyakin                   |
| 152. | <i>Pseudohandelia umbellifera</i> (Boiss.) Tzvelev                                             |
| 153. | <i>Pulicaria gnaphalodes</i> (Vent.) Boiss.                                                    |
| 154. | <i>Pulicaria vulgaris</i> Gaertn.                                                              |
| 155. | <i>Saussurea salsa</i> (Pall. ex Pall.) Spreng.                                                |
| 156. | <i>Scorzonera gageoides</i> Boiss.                                                             |
| 157. | <i>Senecio subdentatus</i> Ledeb.                                                              |
| 158. | <i>Sonchus asper</i> (L.) Hill                                                                 |
| 159. | <i>Sonchus oleraceus</i> L.                                                                    |
| 160. | <i>Tanacetum santolina</i> C.Winkl.                                                            |
| 161. | <i>Taraxacum bicornis</i> Dahlst.                                                              |
| 162. | <i>Taraxacum comitans</i> Kovalevsk                                                            |
| 163. | <i>Taraxacum officinale</i> F.H. Wigg.                                                         |
| 164. | <i>Tripolium pannonicum</i> (Jacq.) Dobroc.                                                    |
| 165. | <i>Xanthium spinosum</i> L.                                                                    |
| 166. | <i>Xanthium strumarium</i> L.                                                                  |
| 167. | <b>BERBERIDACEAE JUSS.</b><br><i>Leontice ewersmannii</i> Bunge                                |
| 168. | <i>Leontice incerta</i> Pall.                                                                  |
| 169. | <b>BIEBERSTEINIACEAE SCHNIZL.</b><br><i>Biebersteinia multifida</i> DC.                        |
| 170. | <b>BORAGINACEAE JUSS.</b><br><i>Anchusa azurea</i> Mill.                                       |
| 171. | <i>Arnebia decumbens</i> (Vent.) Coss. & Kralik                                                |
| 172. | <i>Asperugo procumbens</i> L.                                                                  |
| 173. | <i>Cynoglossum viridiflorum</i> Pall. ex Lehm.                                                 |
| 174. | <i>Echium biebersteinii</i> Lacaita                                                            |
| 175. | <i>Heliotropium arguzioides</i> Kar. & Kir.                                                    |
| 176. | <i>Heliotropium dasycarpum</i> Ledeb.                                                          |
| 177. | <i>Heliotropium ellipticum</i> Ledeb.                                                          |
| 178. | <i>Heliotropium micranthos</i> (Pall.) Bunge                                                   |
| 179. | <i>Heliotropium sogdianum</i> Bunge                                                            |
| 180. | <i>Heliotropium dasycarpum</i> subsp. <i>transoxanum</i> (Bunge) Akhani & Förther              |
| 181. | <i>Lappula squarrosa</i> (Retz.) Dumort.                                                       |
| 182. | <i>Lappula microcarpa</i> (Ledeb.) Gürke                                                       |

|      |                                                                                        |
|------|----------------------------------------------------------------------------------------|
| 183. | <i>Onosma dichroantha</i> Boiss.                                                       |
| 184. | <i>Rindera tetraspis</i> Pall.                                                         |
| 185. | <i>Tournefortia sibirica</i> L.                                                        |
| 186. | <i>Trigonotis peduncularis</i> (Trevir.) Benth. ex Hemsl.                              |
| 187. | <i>Trichodesma incanum</i> (Bunge) A. DC.                                              |
| 188. | <b>BRASSICACEAE BURNETT</b><br><i>Alyssum dasycarpum</i> Stephan ex Willd.             |
| 189. | <i>Alyssum turkestanicum</i> Regel & Schmalh.                                          |
| 190. | <i>Barbarea vulgaris</i> R. Br.                                                        |
| 191. | <i>Brassica juncea</i> (L.) Czern.                                                     |
| 192. | <i>Capsella bursa-pastoris</i> (L.) Medik.                                             |
| 193. | <i>Chorispota tenella</i> (Pall.) DC.                                                  |
| 194. | <i>Conringia orientalis</i> (L.) C.Presl                                               |
| 195. | <i>Crambe edentula</i> Fisch & C.A. Mey. ex Korsh.                                     |
| 196. | <i>Descurainia sophia</i> (L.) Webb ex Prantl                                          |
| 197. | <i>Eruca vesicaria</i> (L.) Cav.                                                       |
| 198. | <i>Erucastrum armoracioides</i> (Czern. ex Turez.) Cruchet                             |
| 199. | <i>Erysimum diffusum</i> Ehrh.                                                         |
| 200. | <i>Erysimum quadrangulum</i> Desf.                                                     |
| 201. | <i>Goldbachia laevigata</i> DC.                                                        |
| 202. | <i>Isatis tinctoria</i> L.                                                             |
| 203. | <i>Lachnoloma lehmannii</i> Bunge                                                      |
| 204. | <i>Lepidium appelianum</i> Al-Shehbaz                                                  |
| 205. | <i>Lepidium chalepense</i> L.                                                          |
| 206. | <i>Lepidium draba</i> L.                                                               |
| 207. | <i>Lepidium latifolium</i> L.                                                          |
| 208. | <i>Lepidium perfoliatum</i> L.                                                         |
| 209. | <i>Lepidium ruderae</i> L.                                                             |
| 210. | <i>Rorippa palustris</i> (L.) Besser                                                   |
| 211. | <i>Sinapis arvensis</i> L.                                                             |
| 212. | <i>Sisymbrium irio</i> L.                                                              |
| 213. | <i>Sisymbrium loeselii</i> L.                                                          |
| 214. | <i>Thlaspi arvense</i> L.                                                              |
| 215. | <b>BUTOMACEAE</b><br><i>Butomus umbellatus</i> L.                                      |
| 216. | <b>CAPPARACEAE JUSS.</b><br><i>Capparis spinosa</i> var. <i>herbacea</i> (Willd.) Fici |
| 217. | <i>Capparis spinosa</i> L.                                                             |
| 218. | <b>CAPRIFOLIACEAE JUSS.</b><br><i>Cephalaria syriaca</i> (L.) Schrad.                  |
| 219. | <i>Lonicera tatarica</i> L.                                                            |
| 220. | <i>Valeriana triplaris</i> (Boiss. & Buhse) Christenh. & Byng                          |
| 221. | <b>CARYOPHYLLACEAE JUSS.</b><br><i>Acanthophyllum elatius</i> Bunge                    |
| 222. | <i>Acanthophyllum korolkowii</i><br>Regel & Schmalh.                                   |
| 223. | <i>Acanthophyllum pungens</i><br>(Bunge) Boiss.                                        |
| 224. | <i>Acanthophyllum stenostegium</i><br>Freyn                                            |

|      |                                                                                 |
|------|---------------------------------------------------------------------------------|
| 225. | <i>Gypsophila paniculata</i> L.                                                 |
| 226. | <i>Gypsophila perfoliata</i> L.                                                 |
| 227. | <i>Gypsophila vaccaria</i> (L.) Sm.                                             |
| 228. | <i>Holosteum umbellatum</i> L.                                                  |
| 229. | <i>Lepyrodiclis holosteoides</i> (C.A. Mey.) Fenzl ex Fisch. & C.A. Mey.        |
| 230. | <i>Silene nana</i> Kar. & Kir.                                                  |
| 231. | <i>Silene viscosa</i> (L.) Pers.                                                |
| 232. | <i>Stellaria graminea</i> L.                                                    |
| 233. | <i>Stellaria media</i> (L.) C.Presl                                             |
| 234. | <b>COLCHICACEAE DC.</b><br><i>Colchicum kesselringii</i> Regel                  |
| 235. | <i>Colchicum robustum</i> (Bunge) Stef.                                         |
| 236. | <b>CONVOLVULACEAE JUSS.</b><br><i>Calystegia sepium</i> (L.) R. Br.             |
| 237. | <i>Convolvulus arvensis</i> L.                                                  |
| 238. | <i>Convolvulus divaricatus</i> Regel & Scmalh.                                  |
| 239. | <i>Convolvulus fruticosus</i> Pall.                                             |
| 240. | <i>Convolvulus hamadae</i> (Vved.) V.Petrov                                     |
| 241. | <i>Convolvulus dorycnium</i> subsp. <i>subhirsutus</i> (Regel & Schmalh.) Sa'ad |
| 242. | <i>Cressa cretica</i> L.                                                        |
| 243. | <i>Cuscuta approximate</i> Bab.                                                 |
| 244. | <i>Cuscuta campestris</i> Yunck.                                                |
| 245. | <i>Cuscuta chinensis</i> Lam.                                                   |
| 246. | <i>Cuscuta europaea</i> L.                                                      |
| 247. | <i>Cuscuta lehmanniana</i> Bunge                                                |
| 248. | <i>Cuscuta monogyna</i> Vahl                                                    |
| 249. | <i>Cuscuta pedicellata</i> Ledeb.                                               |
| 250. | <b>CUCURBITACEAE</b><br><i>Bryonia melanocarpa</i> Nabiev                       |
| 251. | <b>CYPERACEAE JUSS.</b><br><i>Bolboschoenus maritimus</i> (L.) Palla            |
| 252. | <i>Bolboschoenus maritimus</i> subsp. <i>affinis</i> (Roth) T.Koyama            |
| 253. | <i>Carex melanostachya</i> M.Bieb. ex Willd.                                    |
| 254. | <i>Carex riparia</i> Curtis                                                     |
| 255. | <i>Cyperus fuscus</i> L.                                                        |
| 256. | <i>Cyperus glomeratus</i> L.                                                    |
| 257. | <i>Cyperus longus</i> L.                                                        |
| 258. | <i>Cyperus rotundus</i> L.                                                      |
| 259. | <i>Schoenoplectus lacustris</i> (L.) Palla                                      |
| 260. | <i>Schoenoplectiella mucronata</i> (L.) J.Jung & H.K.Choi                       |
| 261. | <b>DRYOPTERIDACEAE CHING</b><br><i>Dryopteris filix-mas</i> (L.) Schott         |
| 262. | <b>ELAEAGNACEAE JUSS.</b><br><i>Elaeagnus angustifolia</i> L.                   |
| 263. | <b>EPHEDRACEAE DUMORT.</b><br><i>Ephedra distachya</i> L.                       |
| 264. | <i>Ephedra intermedia</i> Schrenk & C.A.Mey.                                    |
| 265. | <i>Ephedra lomatolepis</i> Schrenk                                              |
| 266. | <i>Ephedra strobilacea</i> Bunge                                                |
| 267. | <b>EQUISETACEAE RICH. EX DC.</b>                                                |

|      |                                                                                           |
|------|-------------------------------------------------------------------------------------------|
|      | <i>Equisetum arvense</i> L.                                                               |
| 268. | <i>Equisetum ramosissimum</i> Desf.                                                       |
| 269. | <b>EUPHORBIACEAE JUSS.</b><br><i>Andrachne telephioides</i> L.                            |
| 270. | <i>Chrozophora tinctoria</i> (L.) A.Juss.                                                 |
| 271. | <i>Chrozophora sabulosa</i> Kar. & Kir.                                                   |
| 272. | <i>Euphorbia anisopetala</i> (Prokh.) Prokh.                                              |
| 273. | <i>Euphorbia chamaesyce</i> L.                                                            |
| 274. | <i>Euphorbia densa</i> Schrenk                                                            |
| 275. | <i>Euphorbia falcate</i> L.                                                               |
| 276. | <i>Euphorbia seguieriana</i> Neck.                                                        |
| 277. | <i>Euphorbia turczaninowii</i> Kar. & Kir.                                                |
| 278. | <b>FABACEAE LINDL.</b><br><i>Alhagi maurorum</i> subsp. <i>canescens</i> (Regel) Yakovlev |
| 279. | <i>Alhagi maurorum</i> subsp. <i>kirghisorum</i> (Schrenk) Yakovlev                       |
| 280. | <i>Alhagi maurorum</i> Medik.                                                             |
| 281. | <i>Ammodendron conollyi</i> Bunge ex Boiss.                                               |
| 282. | <i>Ammodendron eichwaldii</i> Ledeb.&C.A.Mey                                              |
| 283. | <i>Astragalus ammophilus</i> Kar. & Kir.                                                  |
| 284. | <i>Astragalus chiwensis</i> Bunge                                                         |
| 285. | <i>Astragalus crenatus</i> Schult.                                                        |
| 286. | <i>Astragalus erioceras</i> Fisch. & C.A.Mey. ex Ledeb.                                   |
| 287. | <i>Astragalus filicaulis</i> Fisch. & C.A.Mey. ex Ledeb.                                  |
| 288. | <i>Astragalus flexus</i> Fisch.                                                           |
| 289. | <i>Astragalus tribuloides</i> Delile                                                      |
| 290. | <i>Astragalus villosissimus</i> Bunge                                                     |
| 291. | <i>Cullen drupaceum</i> (Bunge) Stirthon                                                  |
| 292. | <i>Caragana grandiflora</i> DC.                                                           |
| 293. | <i>Caragana halodendron</i> (Pall.) Dum.Cours.                                            |
| 294. | <i>Eremosparton aphyllum</i> (Pall.) Fisch. & C.A.Mey.                                    |
| 295. | <i>Glycyrrhiza aspera</i> Pall.                                                           |
| 296. | <i>Glycyrrhiza glabra</i> L.                                                              |
| 297. | <i>Lotus corniculatus</i> L.                                                              |
| 298. | <i>Medicago lupulina</i> L.                                                               |
| 299. | <i>Medicago orthoceras</i> (Kar. & Kir.) Trautv.                                          |
| 300. | <i>Medicago sativa</i> L.                                                                 |
| 301. | <i>Melilotus albus</i> Medik.                                                             |
| 302. | <i>Melilotus officinalis</i> (L.) Lam.                                                    |
| 303. | <i>Meristotropis triphylla</i> Fisch. & C.A. Mey.                                         |
| 304. | <i>Prosopis farcta</i> (Banks & Sol.) J.F.Macbr.                                          |
| 305. | <i>Smirnowia turkestanica</i> Bunge                                                       |
| 306. | <i>Sophora alopecuroides</i> L.                                                           |
| 307. | <i>Sophora lehmannii</i> (Bunge) Yakovlev                                                 |
| 308. | <i>Sphaerophysa salsula</i> (Pall.) DC.                                                   |
| 309. | <i>Trifolium pratense</i> L.                                                              |
| 310. | <i>Trifolium repens</i> L.                                                                |
| 311. | <i>Vicia lathyroides</i> L.                                                               |
| 312. | <b>FRANKENIACEAE DESV.</b><br><i>Frankenia hirsuta</i> L.                                 |
| 313. | <i>Frankenia pulverulenta</i> L.                                                          |

|      |                                                                                         |
|------|-----------------------------------------------------------------------------------------|
| 314. | <b>FUMARIACEAE</b><br><i>Corydalis schanginii</i> (Pall.) B.Fedtsch.                    |
| 315. | <i>Fumaria vaillantii</i> Loisel.                                                       |
| 316. | <i>Hypecoum pendulum</i> L.                                                             |
| 317. | <b>GENTIANACEAE JUSS.</b><br><i>Centaurium meyeri</i> (Bunge) Druce                     |
| 318. | <i>Centaurium pulchellum</i> (Sw.) Hayek ex Hand.-Mazz., Stadlm., Janch. & Faltis       |
| 319. | <i>Gentiana olivieri</i> Griseb.                                                        |
| 320. | <i>Schenkia spicata</i> (L.) G.Mans.                                                    |
| 321. | <b>GERANIACEAE JUSS.</b><br><i>Erodium cicutarium</i> (L.) L' Her.                      |
| 322. | <i>Erodium oxyrhinchum</i> M.Bieb.                                                      |
| 323. | <i>Geranium linearilobum</i> DC.                                                        |
| 324. | <b>HIPPURIDACEAE</b><br><i>Hippuris vulgaris</i> L.                                     |
| 325. | <b>IRIDACEAE JUSS.</b><br><i>Iris songarica</i> Schrenk                                 |
| 326. | <i>Iris tenuifolia</i> Pall.                                                            |
| 327. | <b>IXIOLIRIACEAE NAKAI</b><br><i>Ixiolirion tataricum</i> (Pall.) Schult. & Schult.fil. |
| 328. | <b>JUNCACEAE JUSS.</b><br><i>Juncus articulatus</i> L.                                  |
| 329. | <i>Juncus bufonius</i> L.                                                               |
| 330. | <i>Juncus gerardii</i> Loisel.                                                          |
| 331. | <i>Juncus compressus</i> Jacq.                                                          |
| 332. | <i>Juncus ranarius</i> Songeon & E.P.Perrier                                            |
| 333. | <b>JUNCAGINACEAE RICH.</b><br><i>Triglochin palustris</i> L.                            |
| 334. | <b>LAMIACEAE LINDL.</b><br><i>Lagochilus acutilobus</i> (Ledeb.) Fisch. & C.A.Mey.      |
| 335. | <i>Lagochilus gypsaceus</i> Vved.                                                       |
| 336. | <i>Lagochilus inebrians</i> Bunge                                                       |
| 337. | <i>Lallemantia royleana</i> (Benth.) Benth.                                             |
| 338. | <i>Lamium amplexicaule</i> L.                                                           |
| 339. | <i>Lycopus europaeus</i> L.                                                             |
| 340. | <i>Marrubium anisodon</i> K. Koch                                                       |
| 341. | <i>Mentha longifolia</i> var. <i>asiatica</i> (Boriss.) Rech.f.                         |
| 342. | <i>Nepeta cataria</i> L.                                                                |
| 343. | <i>Nepeta olgae</i> Regel                                                               |
| 344. | <i>Salvia spinosa</i> L.                                                                |
| 345. | <i>Scutellaria galericulata</i> L.                                                      |
| 346. | <i>Ziziphora tenuior</i> L.                                                             |
| 347. | <b>LEMNACEAE</b><br><i>Lemna gibba</i> L.                                               |
| 348. | <i>Lemna minor</i> L.                                                                   |
| 349. | <b>LILIACEAE JUSS.</b><br><i>Gagea afghanica</i> A.Terracc.                             |
| 350. | <i>Gagea reticulata</i> (Pall.) Schult. & Schult.f.                                     |
| 351. | <b>LYTHRACEAE J. ST.- HIL.</b><br><i>Ammannia baccifera</i> L.                          |



|      |                                                                                      |
|------|--------------------------------------------------------------------------------------|
| 352. | <i>Lythrum linifolium</i> Kar. & Kir.                                                |
| 353. | <i>Lythrum salicaria</i> L.                                                          |
| 354. | <b>MALVACEAE JUSS.</b><br><i>Abutilon theophrasti</i> Medik.                         |
| 355. | <i>Alcea nudiflora</i> (Lindl.) Boiss.                                               |
| 356. | <i>Alcea rhyticarpa</i> (Trautv.) Iljin                                              |
| 357. | <i>Althaea armeniaca</i> Ten.                                                        |
| 358. | <i>Malva neglecta</i> Wallr.                                                         |
| 359. | <i>Malva pusilla</i> Smith                                                           |
| 360. | <i>Malva sylvestris</i> L.                                                           |
| 361. | <b>MAZACEAE</b><br><i>Dodartia orientalis</i> L.                                     |
| 362. | <b>MORACEAE GAUDICH.</b><br><i>Morus alba</i> L.                                     |
| 363. | <i>Morus nigra</i> L.                                                                |
| 364. | <b>NITRARIACEAE LINDL.</b><br><i>Malacocarpus crithmifolius</i><br>(Retz.) C.A. Mey. |
| 365. | <i>Nitraria schoberi</i> L.                                                          |
| 366. | <i>Nitraria sibirica</i> Pall.                                                       |
| 367. | <i>Peganum harmala</i> L.                                                            |
| 368. | <b>ONAGRACEAE JUSS.</b><br><i>Epilobium hirsutum</i> L.                              |
| 369. | <i>Epilobium palustre</i> L.                                                         |
| 370. | <i>Epilobium tetragonum</i> L.                                                       |
| 371. | <i>Oenothera biennis</i> L.                                                          |
| 372. | <b>OROBANCHACEAE VENT.</b><br><i>Cistanche salsa</i> (C.A. Mey.) G.Beck              |
| 373. | <i>Cistanche flava</i> (C.A. Mey.) Korsh.                                            |
| 374. | <i>Orobanche cernua</i> Loefl.                                                       |
| 375. | <i>Orobanche coerulescens</i> Stephan ex Willd.                                      |
| 376. | <i>Orobanche cumana</i> Wallr                                                        |
| 377. | <i>Orobanche aegyptiaca</i> Pers.                                                    |
| 378. | <b>PAPAVERACEAE JUSS.</b><br><i>Papaver pavoninum</i> Schrenk                        |
| 379. | <i>Papaver dodecandrum</i> (Forssk.) Medik.                                          |
| 380. | <i>Papaver refractum</i> (DC.) K.-F.Günther                                          |
| 381. | <b>PLANTAGINACEAE JUSS.</b><br><i>Holzneria spicata</i> (Korovin) Speta              |
| 382. | <i>Plantago lachnantha</i> Bunge                                                     |
| 383. | <i>Plantago lanceolata</i> L.                                                        |
| 384. | <i>Plantago major</i> L.                                                             |
| 385. | <i>Plantago maritima</i> L.                                                          |
| 386. | <b>PLUMBAGINACEAE JUSS.</b><br><i>Limonium gmelinii</i> (Willd.) O. Kuntze           |
| 387. | <i>Limonium meyeri</i> (Boiss.) Kuntze                                               |
| 388. | <i>Limonium myrianthum</i> (Schren) Kuntze                                           |
| 389. | <i>Limonium otolepis</i> (Schrenk) Kuntze                                            |
| 390. | <i>Limonium suffruticosum</i> (L.) Kuntze                                            |
| 391. | <b>POACEAE BARNHART</b>                                                              |

|      |                                                                         |
|------|-------------------------------------------------------------------------|
|      | <i>Aeluropus lagopoides</i> (L.) Thwaites                               |
| 392. | <i>Agropyron desertorum</i> (Fisch. ex Link.) Schult.                   |
| 393. | <i>Avena fatua</i> L.                                                   |
| 394. | <i>Bothriochloa ischaemum</i> (L.) Keng                                 |
| 395. | <i>Calamagrostis epigejos</i> (L.) Roth                                 |
| 396. | <i>Chloris virgata</i> Sw.                                              |
| 397. | <i>Cynodon dactylon</i> (L.) Pers.                                      |
| 398. | <i>Dactylis glomerata</i> L.                                            |
| 399. | <i>Digitaria ischaemum</i> (Schreb.) Mueh                               |
| 400. | <i>Digitaria sanguinalis</i> (L.) Scop.                                 |
| 401. | <i>Echinochloa crus-galli</i> (L.) Beauv.                               |
| 402. | <i>Elymus repens</i> (L.) Gould                                         |
| 403. | <i>Imperata cylindrica</i> (L.) Beauv.                                  |
| 404. | <i>Lolium multiflorum</i> Lam.                                          |
| 405. | <i>Lolium perenne</i> L.                                                |
| 406. | <i>Lolium temulentum</i> L.                                             |
| 407. | <i>Phalaris arundinacea</i> (L.)                                        |
| 408. | <i>Phragmites australis</i> (Cav.) Trin. ex Steud.                      |
| 409. | <i>Poa annua</i> L.                                                     |
| 410. | <i>Poa bulbosa</i> L.                                                   |
| 411. | <i>Saccharum spontaneum</i> L.                                          |
| 412. | <i>Setaria pumila</i> (Poir.) Roem. & Schult.                           |
| 413. | <i>Sorghum halepense</i> (L.) Pers.                                     |
| 414. | <i>Stipa capillata</i> L.                                               |
| 415. | <i>Stipagrostis pennata</i> (Trin.) De Winter                           |
| 416. | <i>Thinopyrum intermedium</i> (Host) Barkworth & D.R.Dewey              |
| 417. | <b>POLYGONACEAE JUSS.</b><br><i>Atraphaxis frutescens</i> (L.) K. Koch. |
| 418. | <i>Atraphaxis spinosa</i> L.                                            |
| 419. | <i>Calligonum aphyllum</i> (Pall.) Guerke                               |
| 420. | <i>Calligonum arborescens</i> Litv.                                     |
| 421. | <i>Calligonum caput-medusae</i> Schrenk                                 |
| 422. | <i>Calligonum eriopodium</i> Bunge                                      |
| 423. | <i>Calligonum junceum</i> (Fisch. & C.A. Mey.) Litv.                    |
| 424. | <i>Calligonum leucocladum</i> (Schrenk) Bunge                           |
| 425. | <i>Calligonum microcarpum</i> I.G.Borshch.                              |
| 426. | <i>Calligonum mongolicum</i> Turcz.                                     |
| 427. | <i>Fallopia convolvulus</i> (L.) A. Löve                                |
| 428. | <i>Persicaria amphibia</i> (L.) Delarbre                                |
| 429. | <i>Persicaria hydropiper</i> (L.) Delarbre                              |
| 430. | <i>Persicaria lapathifolia</i> (L.) Delarbre                            |
| 431. | <i>Persicaria scabra</i> (Moench) Moldenke                              |
| 432. | <i>Polygonum argyrocoleon</i> Steud. ex Kunze                           |
| 433. | <i>Polygonum aviculare</i> L.                                           |
| 434. | <i>Polygonum patulum</i> M.Bieb.                                        |
| 435. | <i>Rheum tataricum</i> L. fill.                                         |
| 436. | <i>Rheum turkestanicum</i> Janisch.                                     |
| 437. | <i>Rumex conglomeratus</i> Murray                                       |
| 438. | <i>Rumex crispus</i> L.                                                 |
| 439. | <i>Rumex chalepensis</i> Mill.                                          |

|      |                                                                                                   |
|------|---------------------------------------------------------------------------------------------------|
| 440. | <i>Rumex longifolius</i> DC.                                                                      |
| 441. | <i>Rumex marschallianus</i> Reichenb.                                                             |
| 442. | <b>PORTULACACEAE JUSS.</b><br><i>Portulaca oleracea</i> L.                                        |
| 443. | <b>POTAMOGETONACEAE</b><br><i>Potamogeton natans</i> L.                                           |
| 444. | <i>Potamogeton perfoliatus</i> L.                                                                 |
| 445. | <i>Potamogeton pusillus</i> L.                                                                    |
| 446. | <i>Stuckenia pectinata</i> (L.) Börner                                                            |
| 447. | <b>PRIMULACEAE</b><br><i>Lysimachia arvensis</i> var. <i>caerulea</i> (L.) Turland & Bergmeier    |
| 448. | <b>RANUNCULACEAE JUSS.</b><br><i>Adonis scrobiculata</i> Boiss.                                   |
| 449. | <i>Clematis orientalis</i> L.                                                                     |
| 450. | <i>Delphinium camptocarpum</i> Fisch. & C.A.Mey.                                                  |
| 451. | <i>Delphinium leptocarpum</i> (Nevski) Nevski                                                     |
| 452. | <i>Delphinium rugulosum</i> Boiss.                                                                |
| 453. | <i>Delphinium semibarbatum</i> Bien. ex Boiss.                                                    |
| 454. | <i>Ranunculus falcatus</i> L.                                                                     |
| 455. | <i>Ranunculus linearilobus</i> Bunge                                                              |
| 456. | <i>Ranunculus repens</i> L.                                                                       |
| 457. | <i>Ranunculus sceleratus</i> L.                                                                   |
| 458. | <i>Ranunculus testiculatis</i> Crantz                                                             |
| 459. | <i>Ranunculus trichophyllus</i> Chaix                                                             |
| 460. | <i>Thalictrum isopyroides</i> C.A. Mey.                                                           |
| 461. | <b>RHAMNACEAE JUSS.</b><br><i>Rhamnus erythroxylodes</i> subsp. <i>sintenisii</i> (Rech.f.) Mabb. |
| 462. | <i>Ziziphus jujuba</i> Mill.                                                                      |
| 463. | <b>ROSACEAE JUSS.</b><br><i>Prunus spinosissima</i> (Bunge) Franch.                               |
| 464. | <i>Crataegus chlorocarpa</i> Lenn. & K.Koch                                                       |
| 465. | <i>Crataegus pontica</i> K.Koch                                                                   |
| 466. | <i>Potentilla reptans</i> L.                                                                      |
| 467. | <i>Potentilla supina</i> L.                                                                       |
| 468. | <i>Rosa canina</i> L.                                                                             |
| 469. | <i>Rosa laxa</i> Retz.                                                                            |
| 470. | <i>Rosa majalis</i> Herm.                                                                         |
| 471. | <i>Rosa persica</i> Michaut ex Juss.                                                              |
| 472. | <b>RUBIACEAE JUSS.</b><br><i>Galium aparine</i> L.                                                |
| 473. | <i>Galium humifusum</i> Bieb.                                                                     |
| 474. | <i>Galium pamiroalaicum</i> Pobed.                                                                |
| 475. | <i>Galium spurium</i> L.                                                                          |
| 476. | <i>Galium verum</i> L.                                                                            |
| 477. | <i>Rubia tinctorum</i> L.                                                                         |
| 478. | <b>RUTACEAE JUSS.</b><br><i>Haplophyllum acutifolium</i> (DC.) G. Don                             |
| 479. | <i>Haplophyllum bungei</i> Trautv                                                                 |
| 480. | <i>Haplophyllum versicolor</i> Fisch. & C.A. Mey.)                                                |
| 481. | <i>Haplophyllum obtusifolium</i> (Ledeb. ex Eichw.) Ledeb.                                        |

|      |                                                                                            |
|------|--------------------------------------------------------------------------------------------|
| 482. | <i>Haplophyllum pedicellatum</i> Bunge ex Boiss.                                           |
| 483. | <i>Haplophyllum ramosissimum</i> (Paulsen) Vved.                                           |
| 484. | <i>Haplophyllum robustum</i> Bunge                                                         |
| 485. | <b>SALICACEAE MIRB.</b><br><i>Populus alba</i> L.                                          |
| 486. | <i>Populus euphratica</i> Olivier                                                          |
| 487. | <i>Salix alba</i> L.                                                                       |
| 488. | <i>Salix songarica</i> Andersson                                                           |
| 489. | <b>SCROPHULARIACEAE JUSS.</b><br><i>Linaria popovii</i> Kuprian.                           |
| 490. | <i>Scrophularia leucoclada</i> Bunge                                                       |
| 491. | <i>Verbascum blattaria</i> L.                                                              |
| 492. | <i>Verbascum erianthum</i> Benth.                                                          |
| 493. | <i>Verbascum songaricum</i> Schrenk                                                        |
| 494. | <i>Veronica campylopoda</i> Boiss.                                                         |
| 495. | <b>SOLANACEAE JUSS.</b><br><i>Datura stramonium</i> L.                                     |
| 496. | <i>Hyoscyamus niger</i> L.                                                                 |
| 497. | <i>Hyoscyamus pusillus</i> L.                                                              |
| 498. | <i>Lycium dasystemum</i> Pojark.                                                           |
| 499. | <i>Lycium ruthenicum</i> Murray                                                            |
| 500. | <i>Physalis praetermissa</i> Pojark.                                                       |
| 501. | <i>Solanum americanum</i> Mill.                                                            |
| 502. | <i>Solanum dulcamara</i> L.                                                                |
| 503. | <i>Solanum nigrum</i> L.                                                                   |
| 504. | <b>TAMARICACEAE LINK</b><br><i>Tamarix androssowii</i> Litv.                               |
| 505. | <i>Tamarix aralensis</i> Bunge                                                             |
| 506. | <i>Tamarix elongata</i> Ledeb.                                                             |
| 507. | <i>Tamarix hispida</i> Willd.                                                              |
| 508. | <i>Tamarix hohenackeri</i> Bunge                                                           |
| 509. | <i>Tamarix laxa</i> Willd.                                                                 |
| 510. | <i>Tamarix leptostachya</i> Bunge                                                          |
| 511. | <i>Tamarix litwinowii</i> Gorschk.                                                         |
| 512. | <i>Tamarix ramosissima</i> Ledeb.                                                          |
| 513. | <b>THYMELAEACEAE JUSS.</b><br><i>Diarthron vesiculosum</i><br>(Fisch. & C.A.Mey.) C.A.Mey. |
| 514. | <i>Thymelaea passerina</i> (L.) Coss. & Germ.                                              |
| 515. | <b>TYPHACEAE JUSS.</b><br><i>Typha angustifolia</i> L.                                     |
| 516. | <i>Typha elephantine</i> Roxb.                                                             |
| 517. | <i>Typha laxmannii</i> Lepech.                                                             |
| 518. | <b>ULMACEAE MIRB.</b><br><i>Ulmus pumila</i> L.                                            |
| 519. | <i>Ulmus minor</i> Mill.                                                                   |
| 520. | <b>URTICACEAE JUSS.</b><br><i>Urtica dioica</i> L.                                         |
| 521. | <b>VERBENACEAE J. ST. HILL.</b><br><i>Verbena officinalis</i> L.                           |

|      |                                                                    |
|------|--------------------------------------------------------------------|
| 522. | <b>VITACEAE JUSS.</b><br><i>Vitis vinifera</i> L.                  |
| 523. | <b>ZYGOPHYLLACEAE R. BR.</b><br><i>Tribulus macropterus</i> Boiss. |
| 524. | <i>Tribulus terrestris</i> L.                                      |
| 525. | <i>Zygophyllum atriplicoides</i> Fisch. & C.A. Mey.                |
| 526. | <i>Zygophyllum eichwaldii</i> C.A. Mey.                            |
| 527. | <i>Zygophyllum brachypterum</i> Kar. & Kir.                        |
| 528. | <i>Zygophyllum miniatum</i> Cham.                                  |
| 529. | <i>Zygophyllum oxianum</i> Boriss.                                 |
